# Supplementary material for: Assembling Si2BN nanoribbons into a 3D porous structure as a universal anode material for both Li- and Na-ion batteries with high performance
Source: Royal Society of Chemistry journal article supplement (doi:10.1039/d0nr05143h), 2020-01-01
Supplement: d0nr05143h1.pdf [file d0nr05143h1.pdf]

Supporting Information

**Assembling Si<sub>2</sub>BN nanoribbons to a 3D porous structure as a universal anode material for both Li- and Na-ion batteries with high performance**

Umer Younis<sup>a</sup>, Imran Muhammad<sup>a</sup>, Wei Wu<sup>a</sup>, S. Ahmed<sup>b</sup>, Qiang Sun<sup>a,c,\*</sup>, Puru Jena<sup>d</sup>

<sup>a</sup> Department of Materials Science and Engineering, Peking University, Beijing 100871, China.

<sup>b</sup> Center for Advancing Materials Performance from the Nanoscale, State Key Laboratory for Mechanical Behavior of Materials, Xi'an Jiaotong University, Xi'an 710049 China.

<sup>c</sup> Center for Applied Physics and Technology, Peking University, Beijing 100871, China

<sup>d</sup> Department of Physics, Virginia Commonwealth University, Richmond, VA 23284, USA

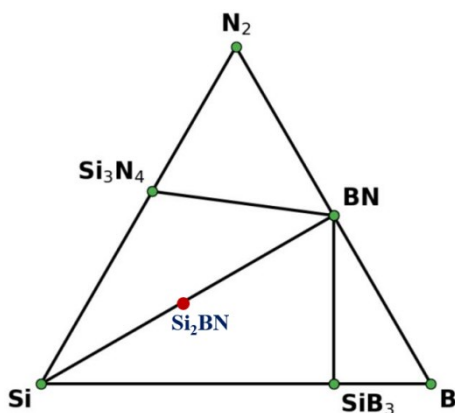

Figure. S1 Energy hull of Si<sub>2</sub>BN

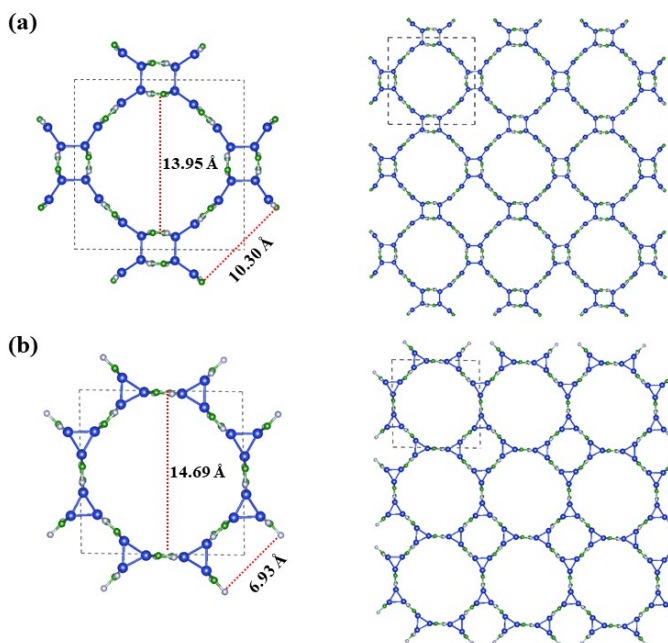

Figure. S2 (a) Unit cell and 3×3×3 supercell of α-3D-Si<sub>2</sub>BN. (b) Unit cell and 3×3×3 supercell of β-3D-Si<sub>2</sub>BN.

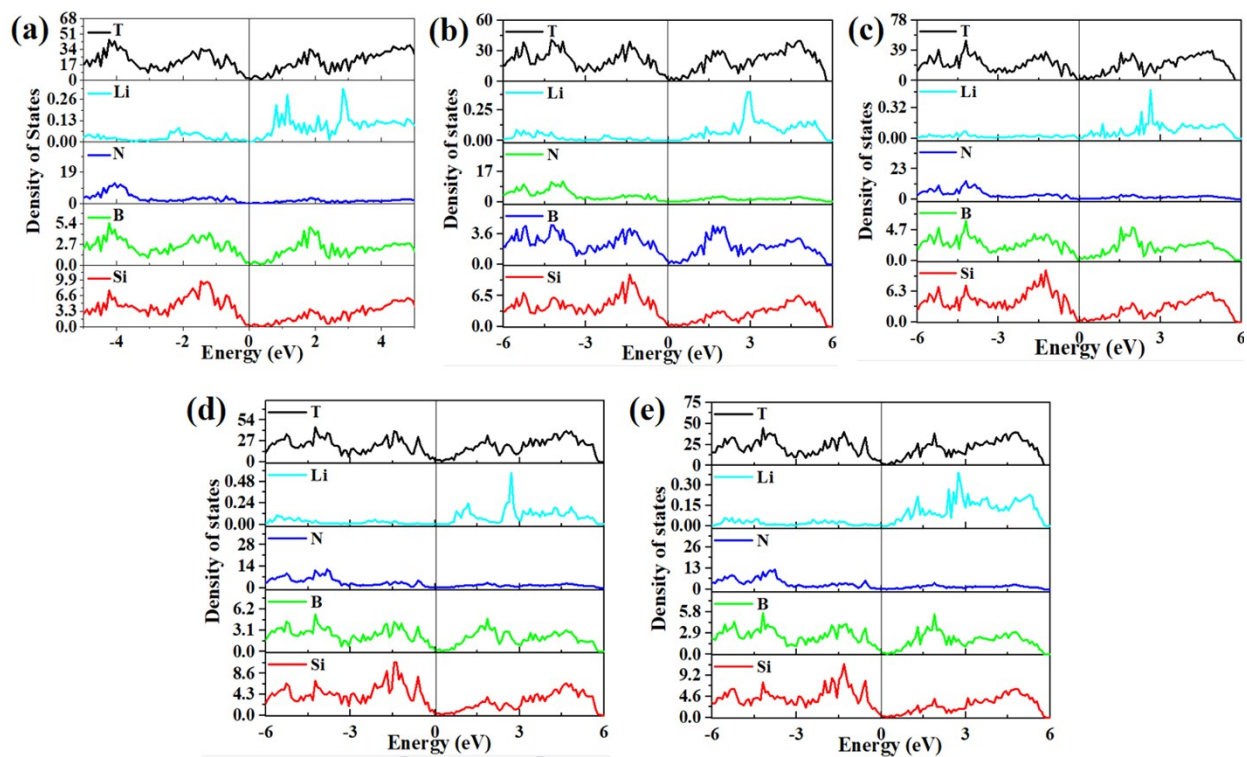

**Figure. S3** (a-e) The partial density of states (PDOS) for Li-adsorption at site  $S_1$ - $S_5$  respectively.

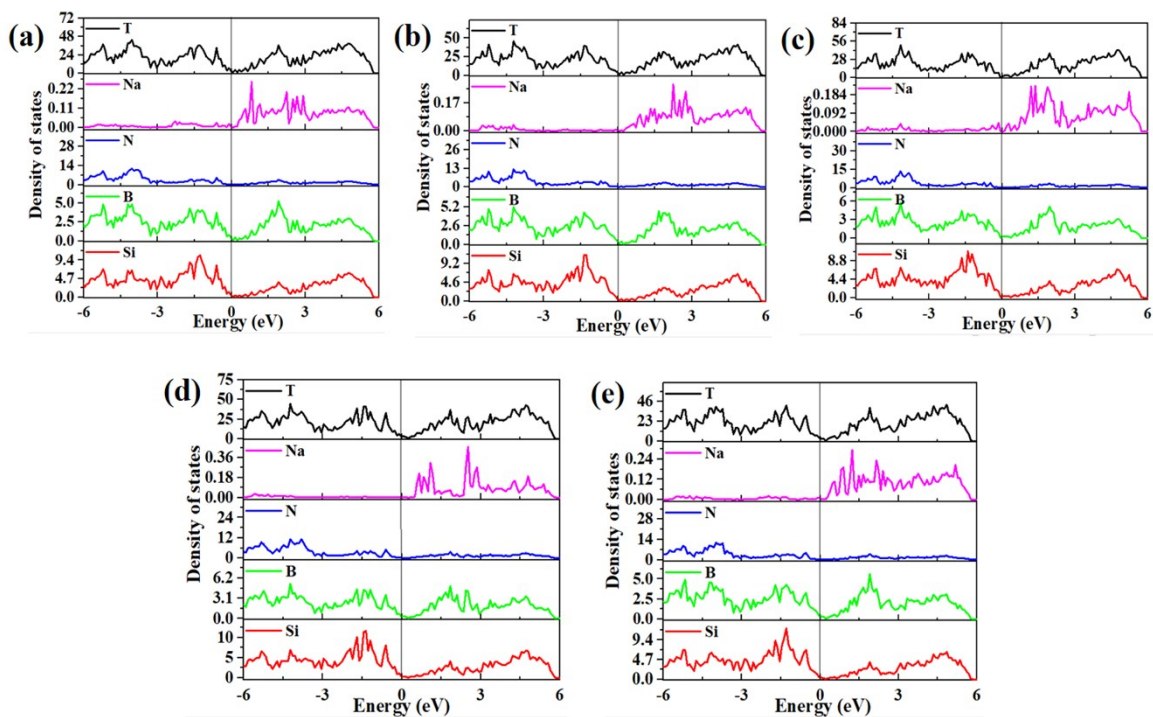

**Figure. S4** (a-e) The partial density of states (PDOS) for Na-adsorption at site  $S_1$ - $S_5$  respectively.

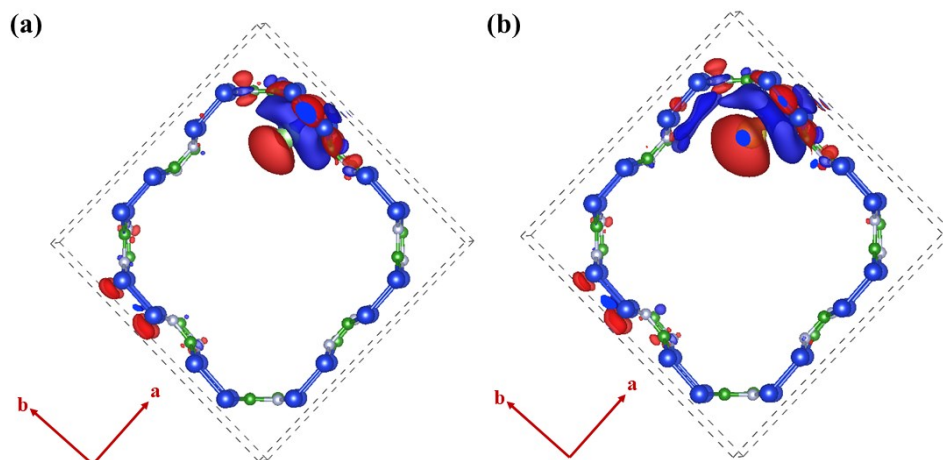

**Figure. S5** Pictorial representation of charge density difference for (a) Lithium and (b) Sodium, at the second most stable site ( $S_2$ ) in 3D-Si<sub>2</sub>BN.

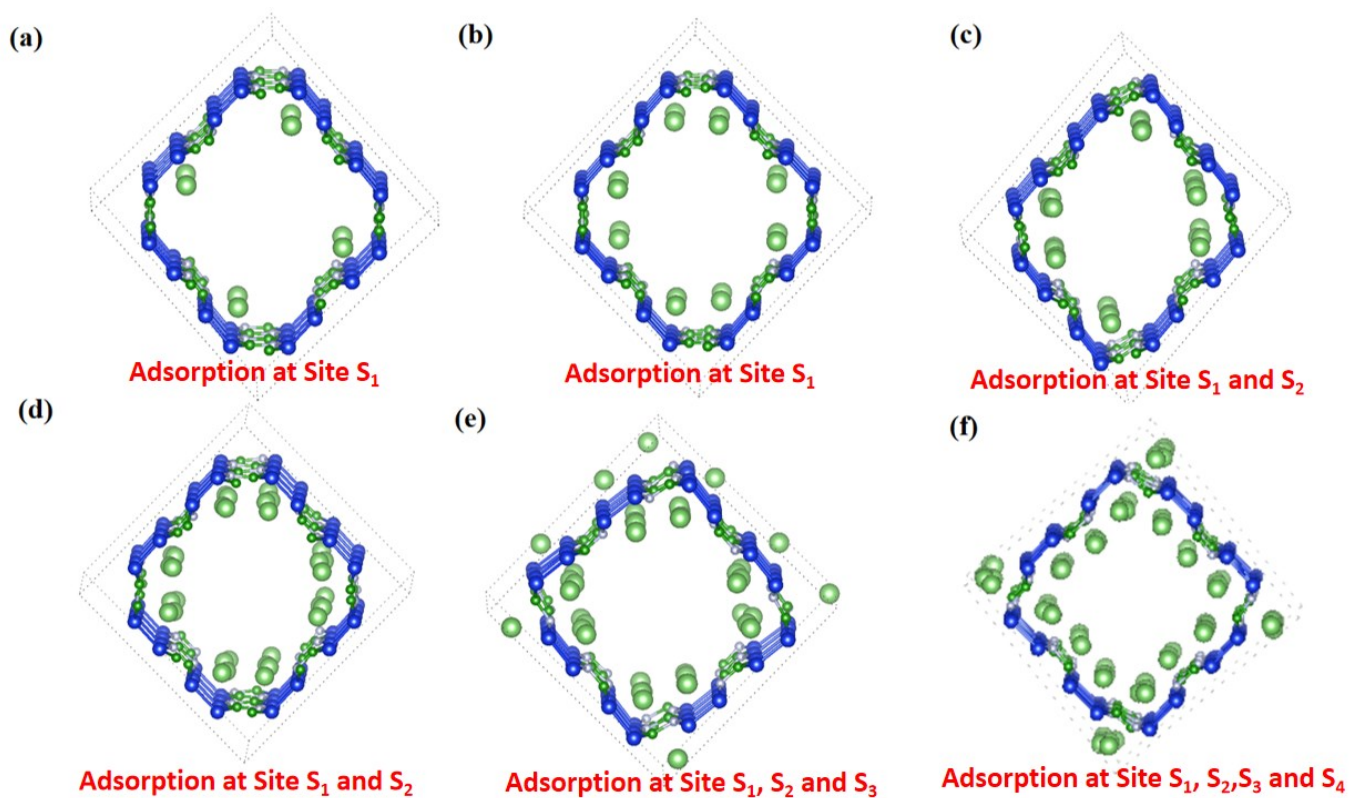

**Figure. S6** The side views of six different concentrations of lithium ions in 3D-Si<sub>2</sub>BN (a) 0.062 (b) 0.125 (c) 0.185 (d) 0.250 (e) 0.312 (f) 0.375

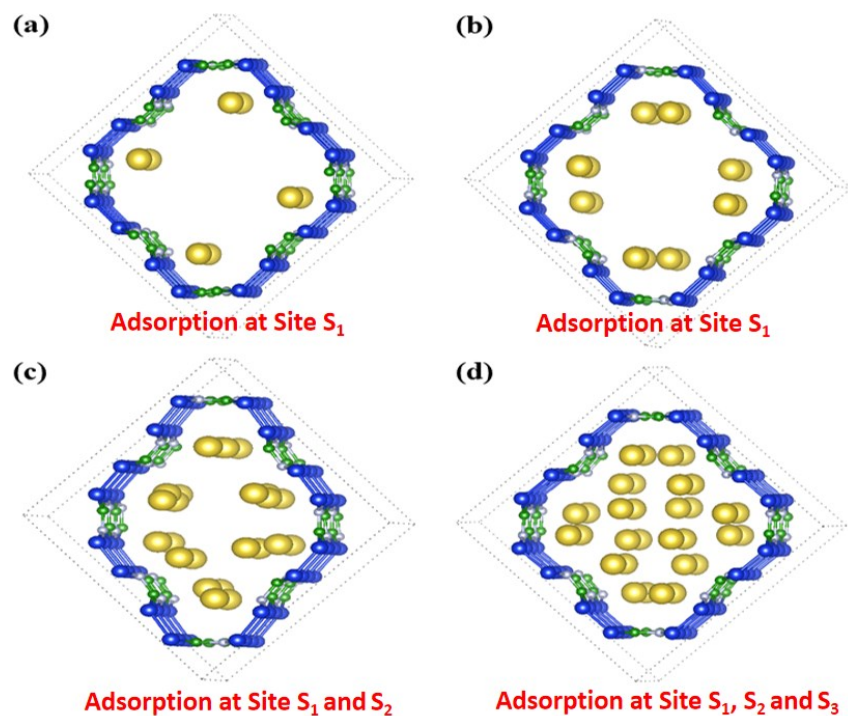

**Figure. S7** The side view of four different concentrations of sodium ions in 3D-Si<sub>2</sub>BN (a) 0.062 (b) 0.125 (c) 0.185 (d) 0.250

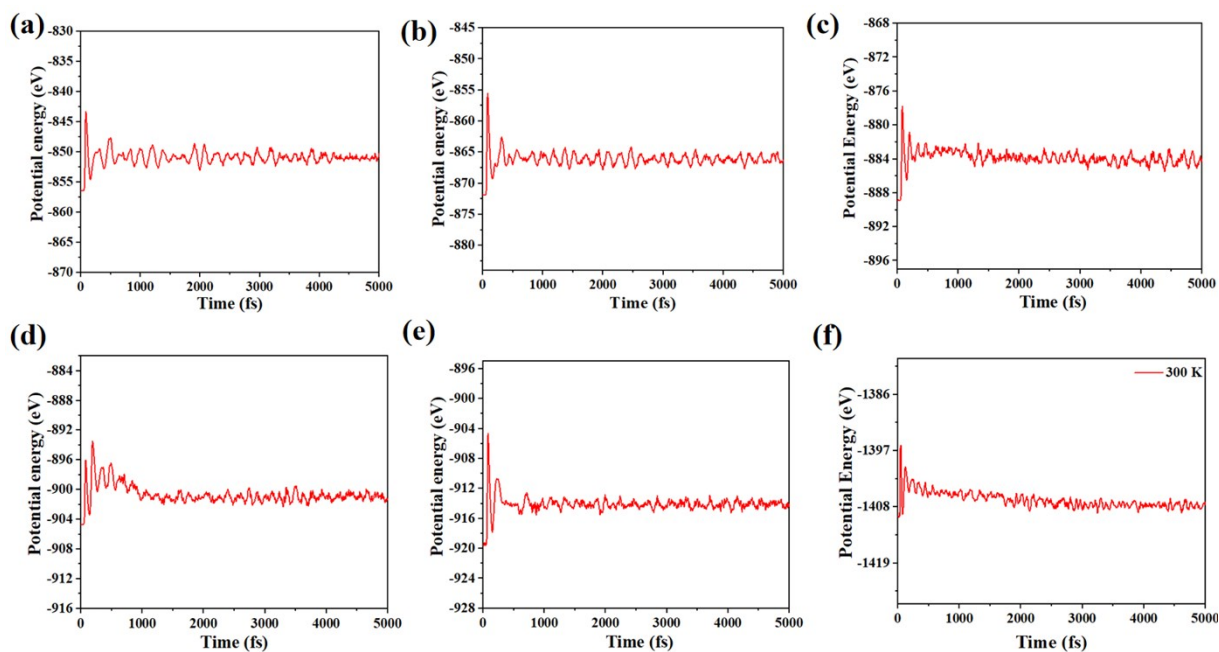

**Figure. S8** (a) The AIMD simulation at room temperature for the following six different concentrations of lithium ions. (a) 0.062 (b) 0.125 (c) 0.185 (d) 0.250 (e) 0.312 (f) 0.375

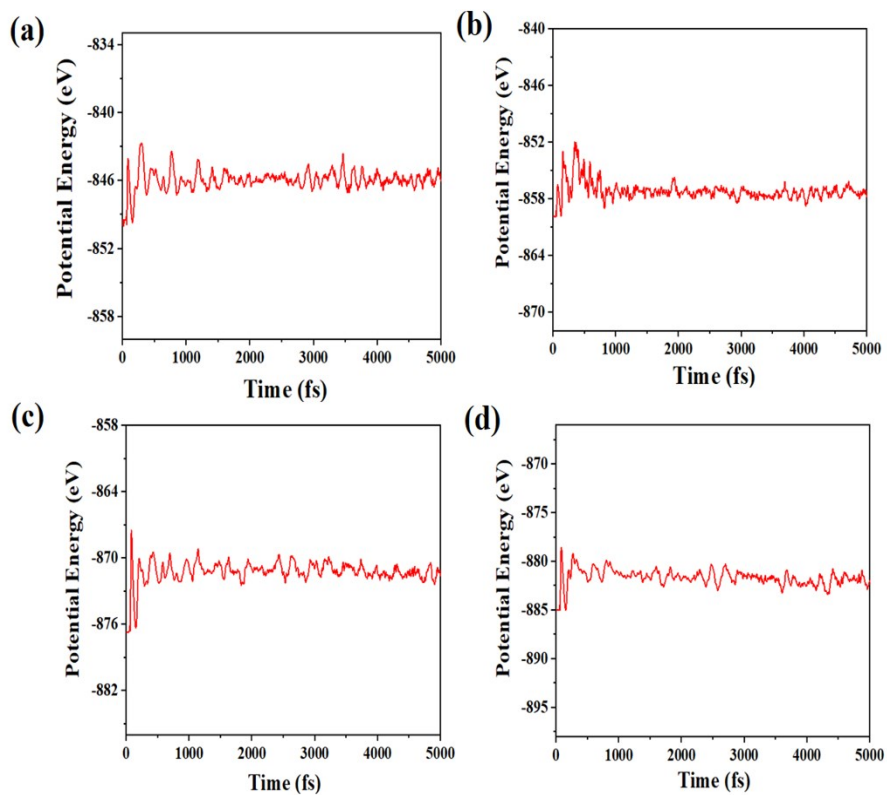

**Figure. S9** (a) The AIMD simulation at room temperature for the following four different concentrations of sodium ions. (a) 0.062 (b) 0.125 (c) 0.185 (d) 0.250

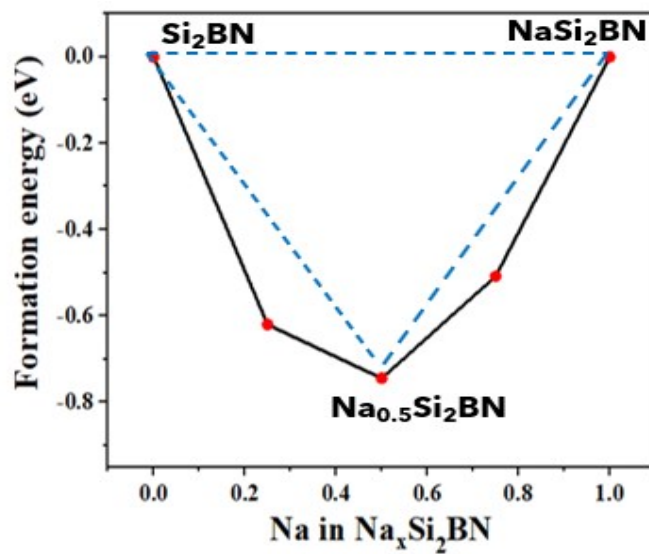

**Figure. S10** Energy hull of  $\text{NaSi}_2\text{BN}$  during discharging

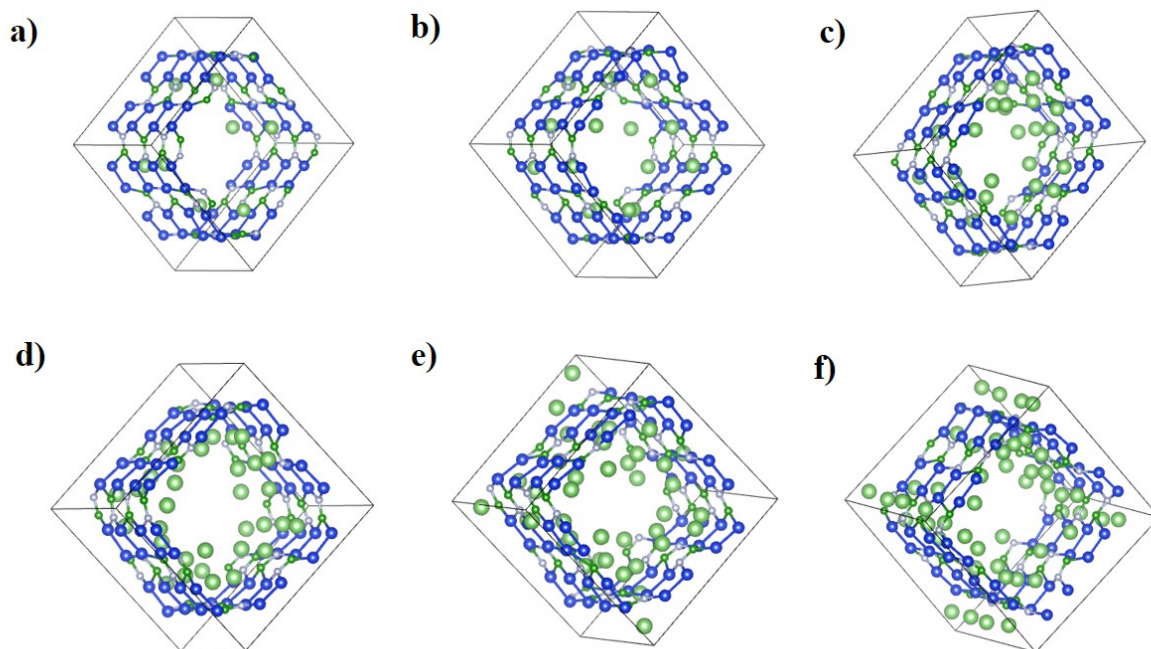

**Figure. S11** The AIMD exposed surface of the following six concentrations of lithium ions in 3D-Si<sub>2</sub>BN (a) 0.062 (b) 0.125 (c) 0.185 (d) 0.250 (e) 0.312 (f) 0.375 at 300 K.

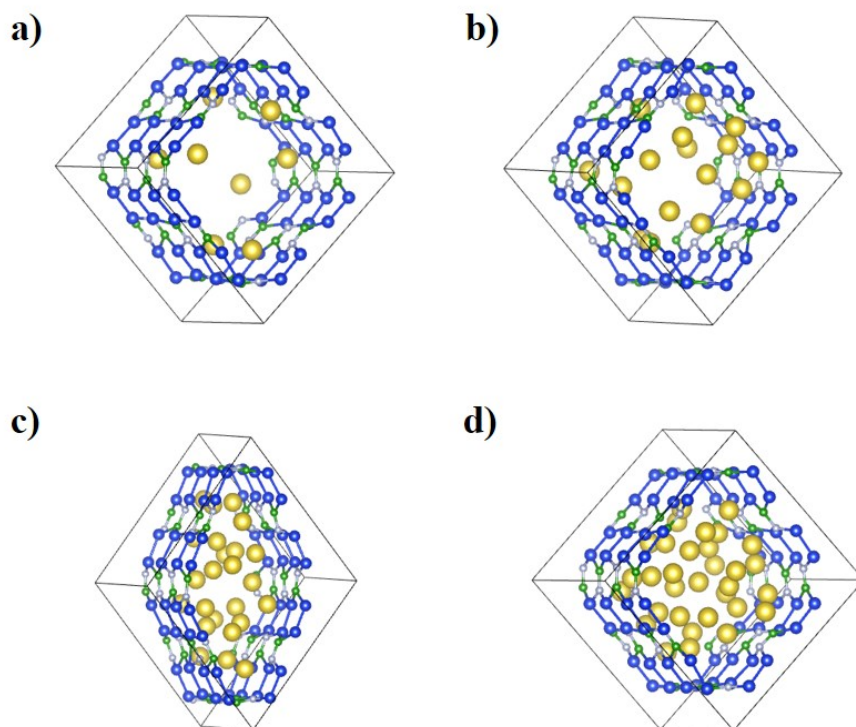

---

**Figure. S12** The AIMD exposed surface of the following four concentrations of sodium ions in 3D-Si<sub>2</sub>BN (a) 0.062 (b) 0.125 (c) 0.185 (d) 0.250 at 300 K.
